# Supplementary material
Source: MDPI journal article supplement (https://www.mdpi.com/2073-4395/12/8/1763)
Supplement: s1 [file s1]

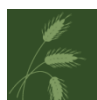

**Figure S1.** The expression of *PcNCX1* in the sample treated with CA by qRT-PCR. Error bars represent standard deviation. \* $P < 0.05$ , significant difference.

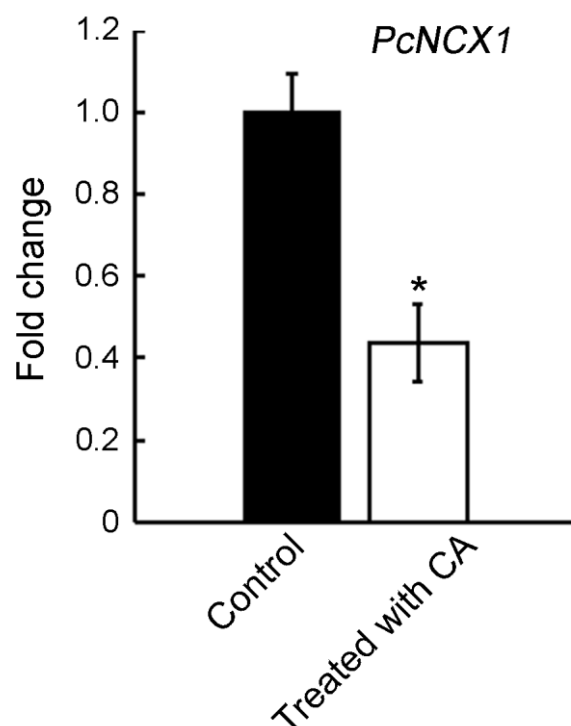

**Table S1.** The CDS sequence of *PcNCX1*.

>*PcNCX1* (131120)

```
ATGGCTCAGCGCCGACGCATCCGGAGGCTGACGCGGCAGGCACTGGGCACTGCGTTGGTCATCACTGGCTGCGCGACAGG
CTTTGTGGCTATGACTTACCGCGTGCTGTCCGATCCAGCACCAGCCGCTCGTGTACTGGCCGAAGCGTCTTCCTCCTCCGAC
GCAGACACGTGCGGTAAATTAGATTCTTGGGAGACAAGTGGTGGCATTCTGTGCTGTACGTCATGGCGCTGGGCTACATCTTC
GTGTCGCTCGCCATAATCTGCGATGACTACTTCGTGTGCGGCACTGGAGAAAATCTCCGACGCTCTAAATCTGTACCCGAC
GTTGCTGGAGCCACGTTTCATGGCCGCCGGGTCATCAGCCCCGAACCTTTTCGTGCTCTGGCCGACAATGTTTTCAAGAAG
CCCGCAGAGAGTCTGGGCGTTGGTACAATCGTGGGCTCGGCCATATTCAACATTCTCATCATTATCTCACTGTGCGGGGCTTC
TGTCGGGACAAGTGCTCAAGCTCGACTGGCGTCCGCTGTTGCGCGACTCGCTCTGGTATACGTGGGCTATTGTGGTACTAG
CCTTCGCTGTGTGGGATGGCAGCATTGACGTGGTGGACTCGACCATGATGGTCAGTTTCGTACGCGAGCTATATCGCTTACA
TGGGGTTCAATGAGCGGGTGGTAAACTGTTGTTGCAAGCGACCGGAGGCCATCGAAGTCCCGAAAAGGAAAAGGACAA
GCTGATGTCAATATCCAAGTCGGACGGCACTTCCTCTGCGGAGATAGTAGTCACTACCACTGGCGACGTCCAAAACCTCGTT
GGTAGAAGAGGGGCATTACCCAACCAAAACGGATTTCTCGCCGAACAGGACAAATTGAACCCGATTCTTCGGTCCAAGT
ATCGCATGTTCCAAGCGCACCAGTTACTTGAGCGAACAATTCATCAGGCGAACTCGATGTAGAAGCTCCAGAACAAACAT
GTTGTGAAGCCAAGTCCGAAACAGCAATTGAACGAAGTACCGGACGAAGAACCACTGCCGAAATATTTTGACGATGTCAT
CGTCCGCCACAAGGCATTTTGGCAAAAATGTGGTTTGTATTACGTGGCCTATTGTGGCCTTGGCCCGCATCACTATTCCC
GACTGCCGTTACCCAGCGTTTCTGGACCTATAGGGTACTCTGCGACGTTTTTGATCTCCATCGCTTGGATCGGTGTGCTTTC
GCACTACACTGTTGCTTTTGGAAACCAAGTTTGATGCATTGCCGGCATAACCATCTGCGCTCATGGGGCTGACAATCATTGC
GGCAGGCACGTCAATTCCAGATGCGCTGAGCTCTATTCTCGTAGCCCGCGATGGCCATGGAGATATGGCGGTTTCTAACGC
ACTCGGAAGCAATGTGTTTCGACATTCTTTTGGACTGGGGCTTCCTTTTCTTGTCAAACCTGGTCTACAACGAAACTGTA
CCTGTAGCAGGAAACGATCTCGACGTGTGATCGCGATCTTGTTCGCTGTACTGCTATTGCTGTGCGGGTGCTGATTTTCAT
CACGCTGGAGACTCTATCCATCCGCCTGTGGATTCTGTTGATGCTCTACGTGCTATATATTGTTTTCTCATATCTTCGCGGC
TTGGACATCATTTAA
```

**Table S2.** Summary of DEGs encoding ABC transporter genes.

| Gene ID | log2 Ratio<br>(CA_treatment/Control) | Up/Down-Regulation<br>(CA_treatment/Control) | P-value   | Gene annotation                              |
|---------|--------------------------------------|----------------------------------------------|-----------|----------------------------------------------|
| 525156  | 5.600983311                          | Up                                           | 0         | ABC transporter G family member 31           |
| 13039   | 5.511844572                          | Up                                           | 0         | ABC transporter G family member 36           |
| 537832  | 5.396476495                          | Up                                           | 0         | ABC transporter G family member 31           |
| 98810   | 5.091596641                          | Up                                           | 3.59E-29  | ABC transporter G family member 40           |
| 7576    | 4.875890369                          | Up                                           | 0         | ABC transporter G family member 36           |
| 571243  | 4.738528259                          | Up                                           | 0         | ABC transporter G family member 36           |
| 525295  | 3.543131594                          | Up                                           | 0         | ABC transporter G family member 31           |
| 129233  | 3.327361981                          | Up                                           | 7.76E-34  | ABC transporter G family member 36           |
| 110336  | 1.81344868                           | Up                                           | 6.20E-30  | ABC transporter G family member 36           |
| 110336  | 1.81344868                           | Up                                           | 6.20E-30  | ABC transporter G family member 36           |
| 539268  | 1.732816122                          | Up                                           | 2.81E-73  | ABC transporter G family member 36           |
| 535813  | -2.928544389                         | Down                                         | 0         | ABC transporter A family member 1            |
| 6938    | -2.91153696                          | Down                                         | 1.69E-49  | ABC transporter B family member 11           |
| 534240  | -2.654911378                         | Down                                         | 1.54E-29  | ABC transporter C family member 3            |
| 120597  | -2.507164229                         | Down                                         | 1.24E-12  | ABC transporter A family member 1            |
| 533200  | -2.36705747                          | Down                                         | 1.50E-138 | ABC transporter A family member 1            |
| 22031   | -2.304854582                         | Down                                         | 2.36E-22  | ABC transporter B family member 2            |
| 7657    | -2.26589406                          | Down                                         | 1.90E-05  | ABC transporter G family member 48           |
| 537834  | -2.221053493                         | Down                                         | 3.12E-07  | ABC transporter G family member 34           |
| 537849  | -2.186075628                         | Down                                         | 0         | ABC transporter G family member 1            |
| 577748  | -2.177622436                         | Down                                         | 0         | ABC transporter G family member 11           |
| 511522  | -2.10205815                          | Down                                         | 1.75E-273 | ABC transporter G family member 11           |
| 553481  | -2.082904559                         | Down                                         | 1.10E-54  | ABC transporter G family member 13           |
| 21268   | -2.062639324                         | Down                                         | 0         | ABC transporter G family member 11           |
| 534200  | -2.057110637                         | Down                                         | 1.99E-65  | ABC transporter G family member 29           |
| 535815  | -2.033455297                         | Down                                         | 4.94E-73  | ABC transporter A family member 1            |
| 536708  | -1.940724191                         | Down                                         | 1.38E-12  | ABC transporter G family member 35           |
| 530618  | -1.934692561                         | Down                                         | 1.39E-82  | ABC transporter C family member 8            |
| 6355    | -1.915935735                         | Down                                         | 4.94E-08  | ABC transporter G family member 29           |
| 103770  | -1.883806982                         | Down                                         | 5.59E-06  | ABC transporter G family member 44           |
| 20829   | -1.651665926                         | Down                                         | 1.26E-11  | ABC transporter G family member 34           |
| 7637    | -1.618909833                         | Down                                         | 3.36E-06  | ABC transporter A family member 1            |
| 537833  | -1.606657572                         | Down                                         | 3.23E-14  | Pleiotropic drug resistance protein<br>TUR2  |
| 504139  | -1.533295265                         | Down                                         | 0         | ABC transporter G family member 29           |
| 574276  | -1.481168993                         | Down                                         | 2.17E-27  | Pleiotropic drug resistance protein<br>TUR2  |
| 20570   | -1.452512205                         | Down                                         | 4.76E-11  | ABC transporter G family member 38           |
| 526098  | -1.444486808                         | Down                                         | 8.83E-26  | ABC transporter B family member 2            |
| 541621  | -1.34129342                          | Down                                         | 1.18E-08  | ABC transporter B family member 2            |
| 571405  | -1.324924347                         | Down                                         | 4.40E-55  | ABC transporter A family member 1            |
| 561581  | -1.272544625                         | Down                                         | 8.24E-32  | ABC transporter B family member 2            |
| 7713    | -1.216932361                         | Down                                         | 3.54E-15  | ABC transporter C family member 3            |
| 543332  | -1.128405732                         | Down                                         | 1.11E-06  | Multidrug resistance-associated<br>protein 1 |
| 564101  | -1.073486465                         | Down                                         | 5.14E-13  | ABC transporter C family member 5            |
| 105401  | -1.037281016                         | Down                                         | 2.03E-06  | ABC transporter G family member 43           |

---

|        |              |      |          |                                   |
|--------|--------------|------|----------|-----------------------------------|
| 504784 | -1.018548662 | Down | 4.19E-08 | ABC transporter G family member 2 |
|--------|--------------|------|----------|-----------------------------------|

---

**Table S3.** Summary of DEGs encoding glucan 1,3-beta-glucosidase genes.

| geneID | log2 Ratio<br>(CA_treatment/<br>Control) | Up/Down-R<br>egulation<br>(CA_treatme<br>nt/Control) | P-value     | Gene annotation             |
|--------|------------------------------------------|------------------------------------------------------|-------------|-----------------------------|
| 5360   | 1.802911977                              | Up                                                   | 7.57E-75    | Glucan 1,3-beta-glucosidase |
| 509157 | 1.560315494                              | Up                                                   | 1.25E-46    | Glucan 1,3-beta-glucosidase |
| 131827 | 1.509364882                              | Up                                                   | 0.000117533 | Glucan 1,3-beta-glucosidase |
| 549616 | 1.32579704                               | Up                                                   | 3.06E-47    | Glucan 1,3-beta-glucosidase |
| 507901 | 1.07685424                               | Up                                                   | 2.33E-154   | Glucan 1,3-beta-glucosidase |
| 9315   | -3.57718515                              | Down                                                 | 6.63E-06    | Glucan 1,3-beta-glucosidase |
| 550275 | -2.882556642                             | Down                                                 | 1.25E-31    | Glucan 1,3-beta-glucosidase |
| 511225 | -2.010197951                             | Down                                                 | 1.25E-39    | Glucan 1,3-beta-glucosidase |
| 47033  | -1.564889898                             | Down                                                 | 0.000406094 | Glucan 1,3-beta-glucosidase |
| 15440  | -1.552047878                             | Down                                                 | 0.00016942  | Glucan 1,3-beta-glucosidase |
| 18960  | -1.274552557                             | Down                                                 | 1.36E-06    | Glucan 1,3-beta-glucosidase |
| 550254 | -1.033894061                             | Down                                                 | 1.87E-68    | Glucan 1,3-beta-glucosidase |

---
